# Supplementary figures and images for: Oncolytic parainfluenza virus combines with NK cells to mediate killing of infected and non-infected lung cancer cells within 3D spheroids: role of type I and type III interferon signaling
Source: PubMed Central journal article supplement — J Immunother Cancer. 2021 Jun 25;9(6):e002373. doi: 10.1136/jitc-2021-002373 (PMC8237729; doi:10.1136/jitc-2021-002373), 2021-06-25

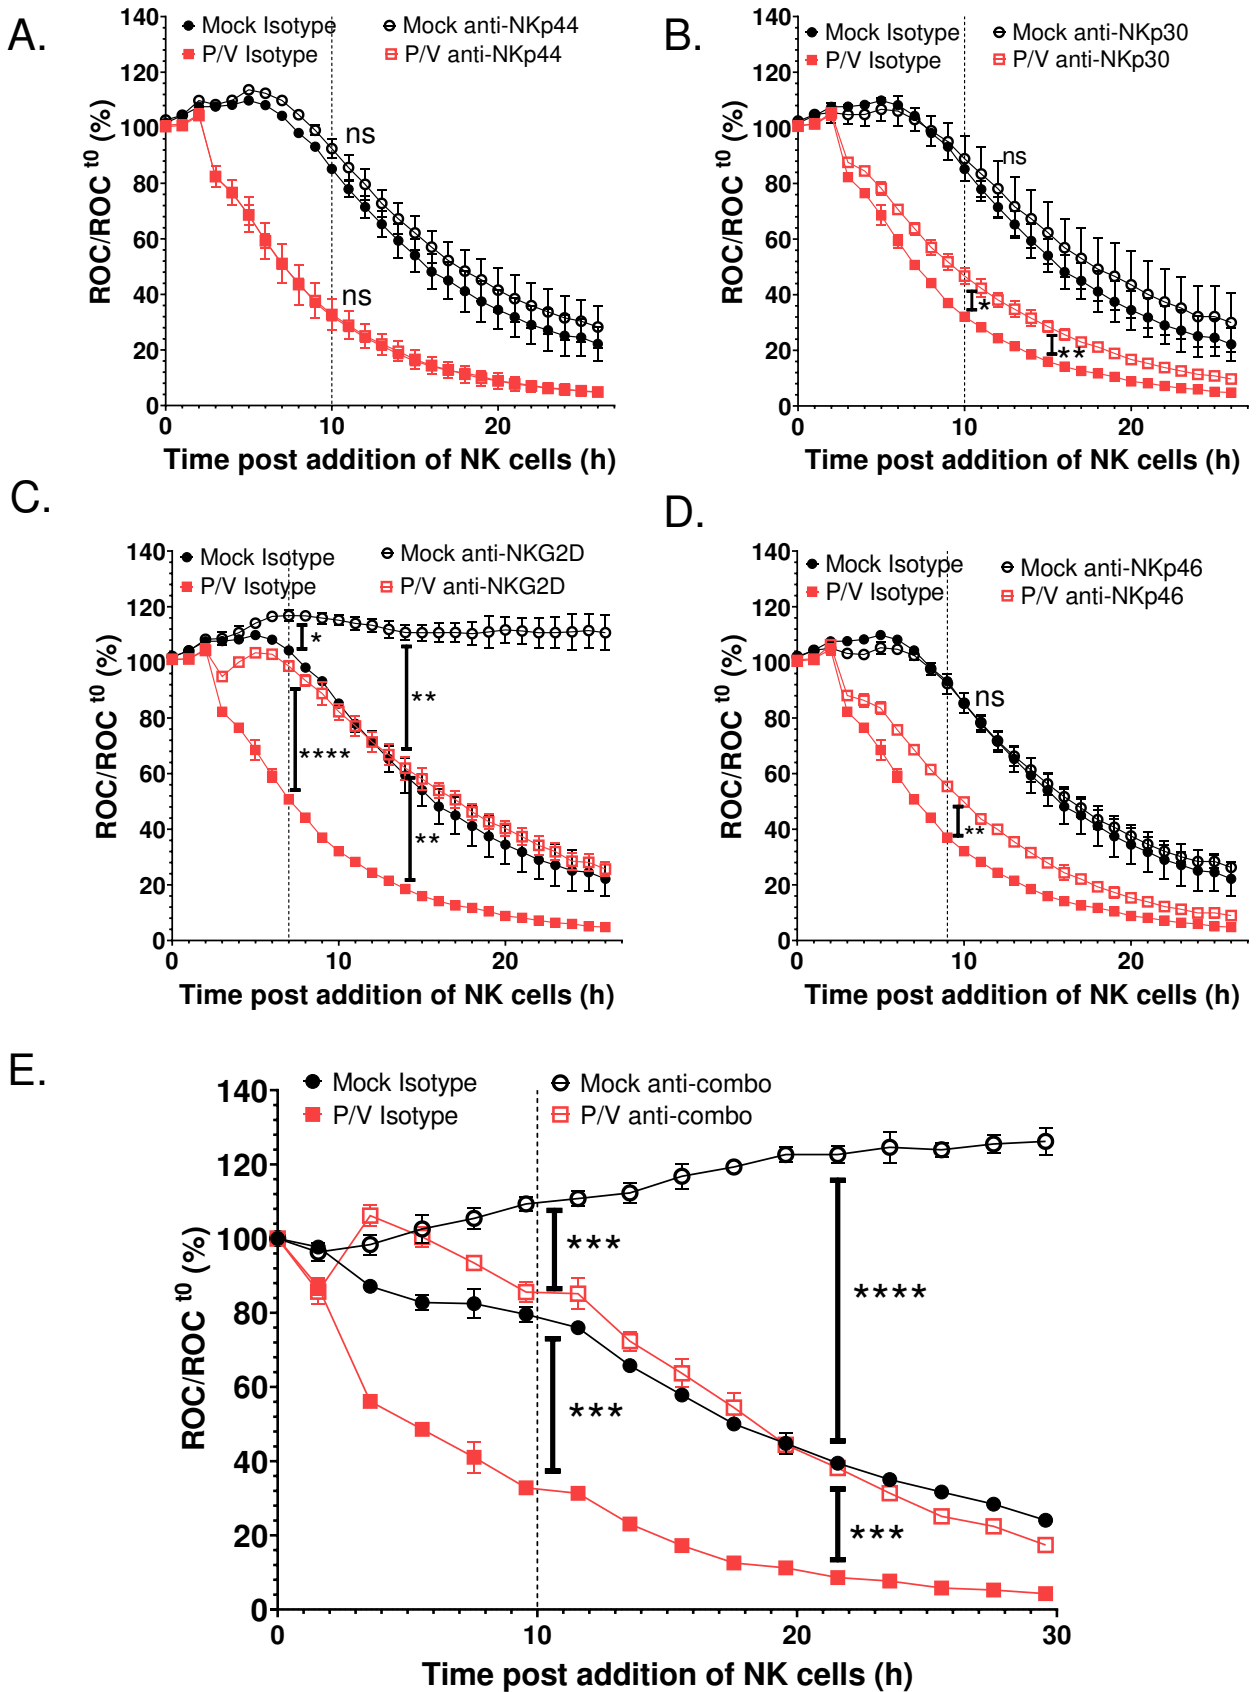

Supplement: jitc-2021-002373supp001.pdf [file jitc-2021-002373supp001.pdf]

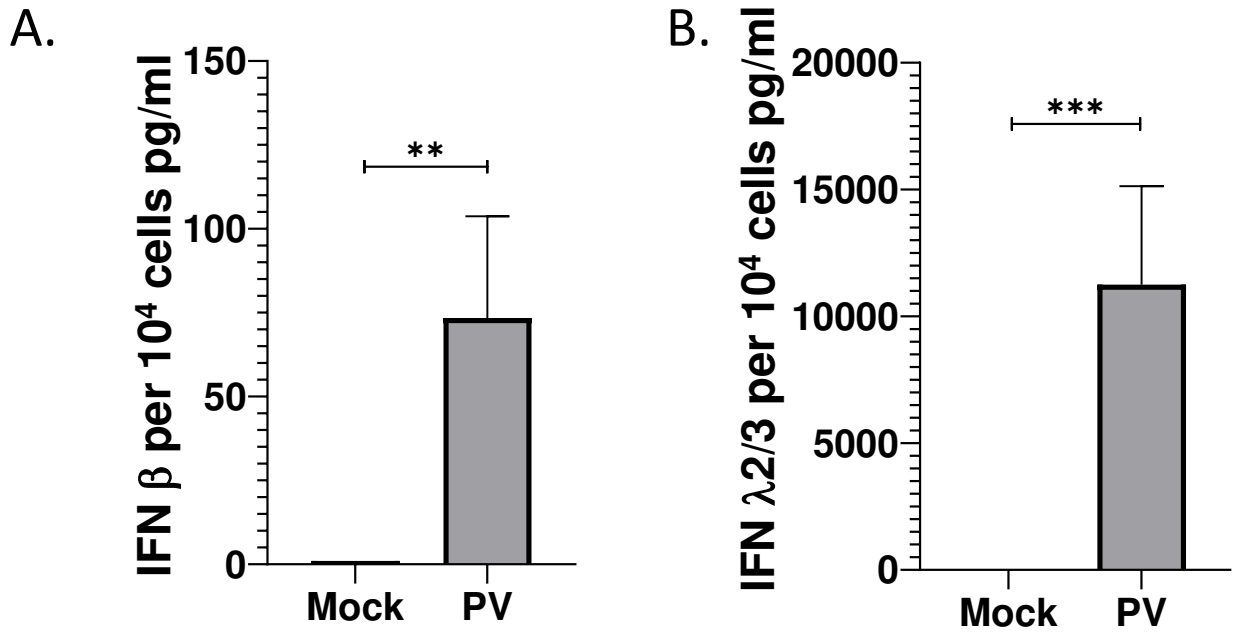

**C.**

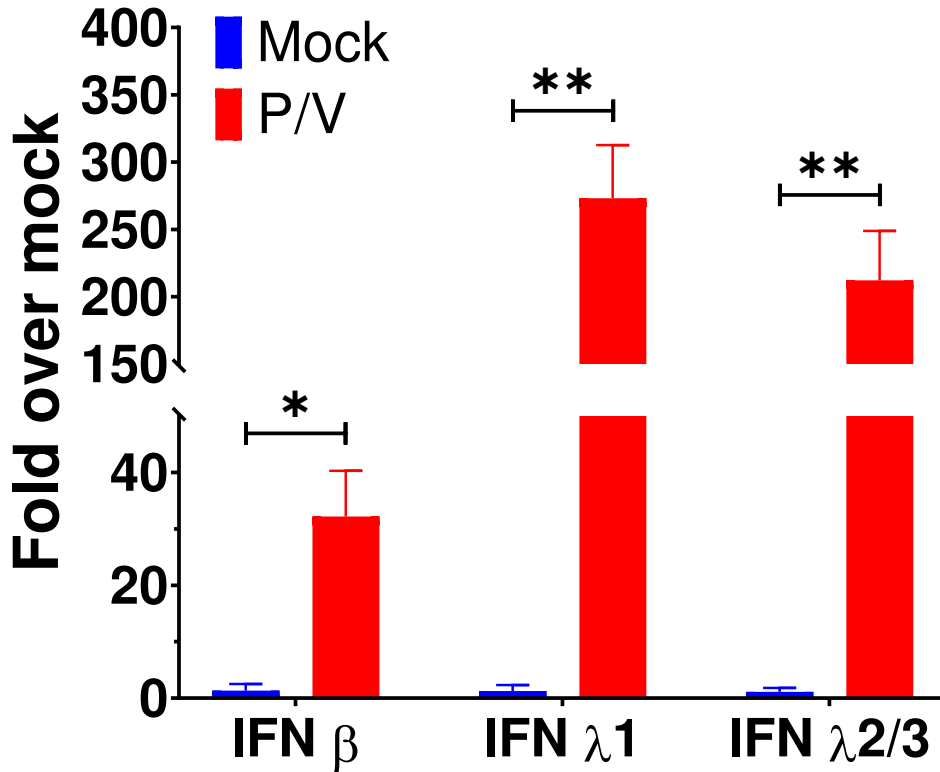

Supplement: jitc-2021-002373supp005.pdf [file jitc-2021-002373supp005.pdf]

A.

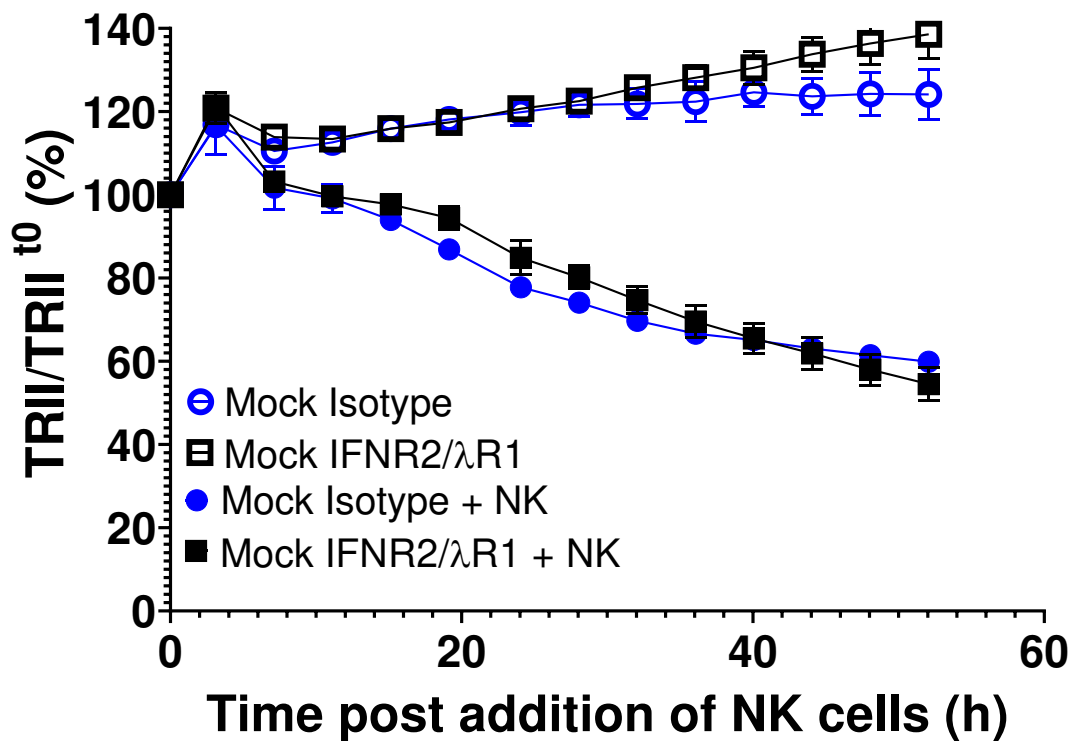

Supplement: jitc-2021-002373supp006.pdf [file jitc-2021-002373supp006.pdf]

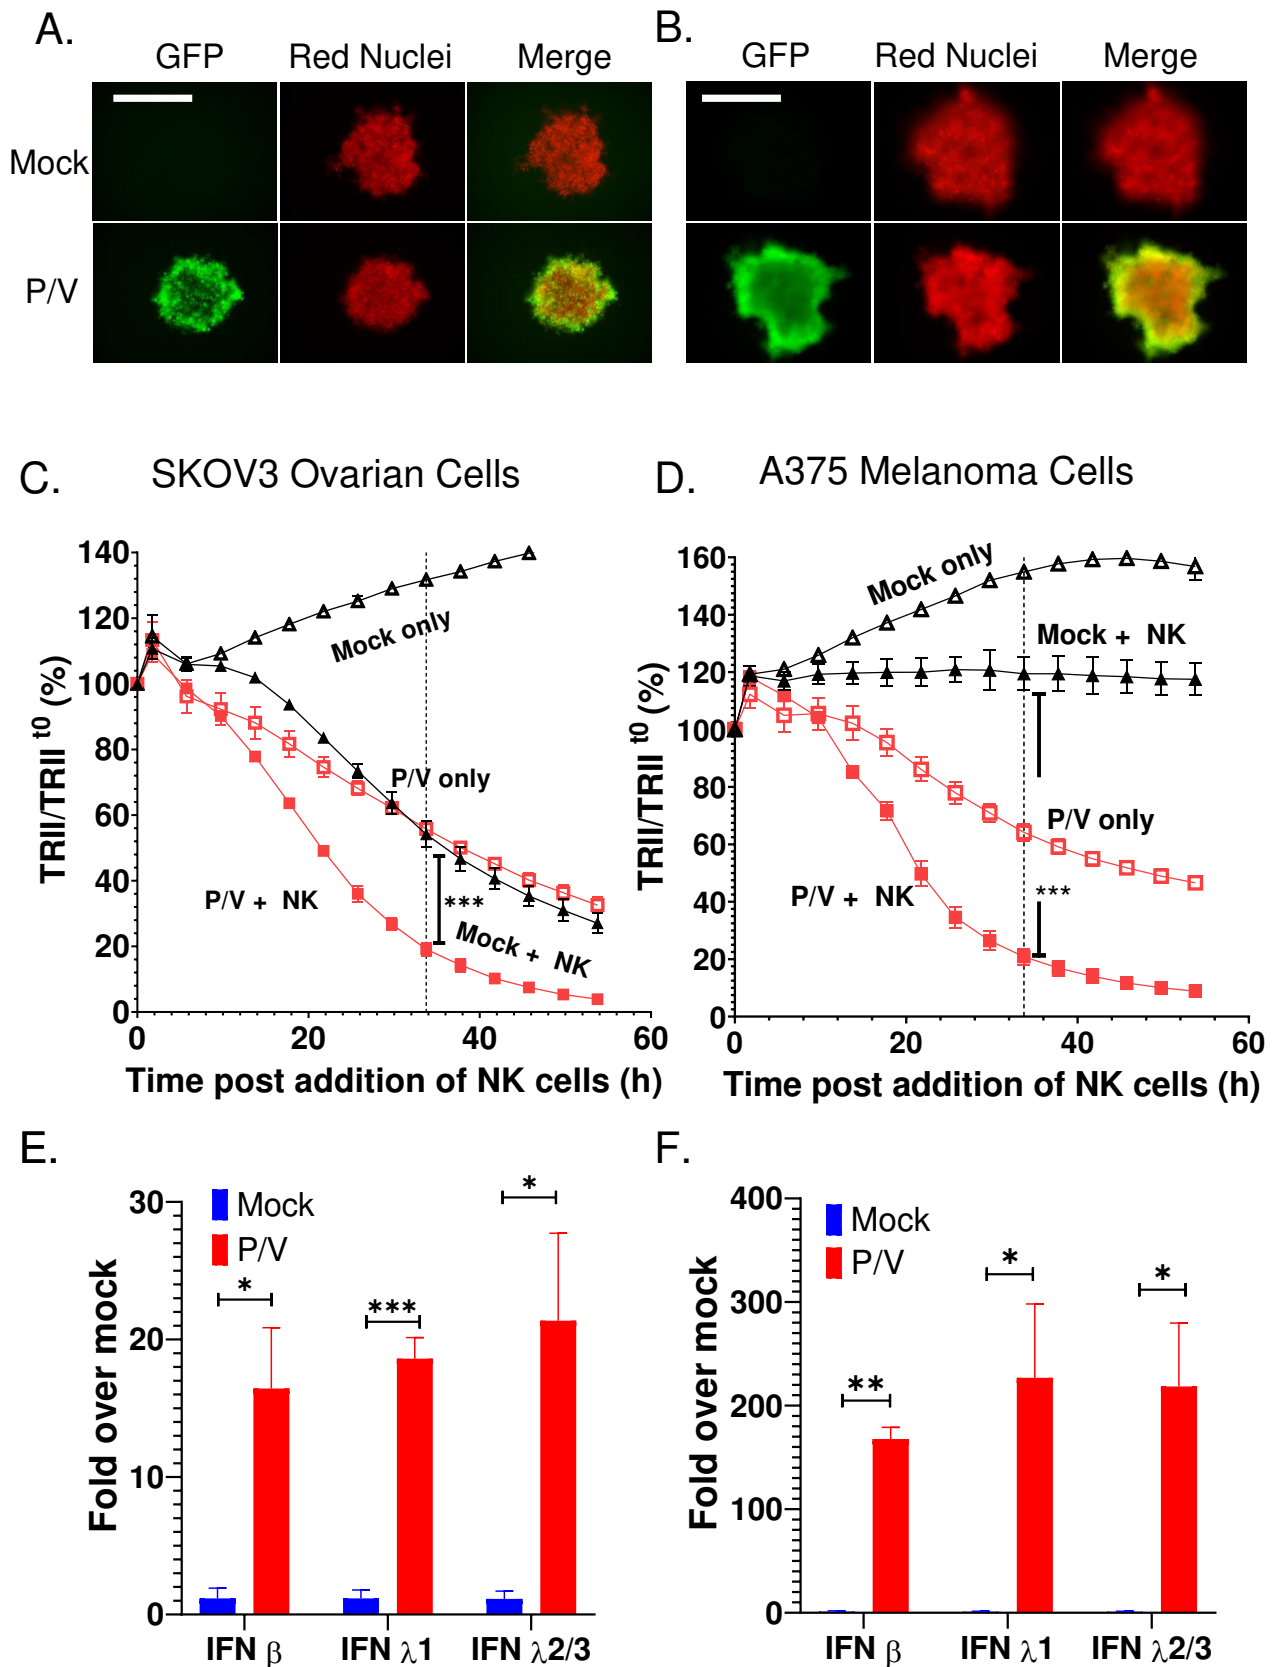

Supplement: jitc-2021-002373supp007.pdf [file jitc-2021-002373supp007.pdf]
